# Supplementary material for: Systematics of Huicundomantis, a new subgenus of Pristimantis (Anura, Strabomantidae) with extraordinary cryptic diversity and eleven new species
Source: PubMed Central journal article supplement (PMC6687670; doi:10.3897/zookeys.868.26766), 2019-08-01
Supplement: zookeys-868-001-s001.pdf [file zookeys-868-001-s001.pdf]

**Appendix A.** Genes and primers used in the study.

| <b>Gene</b> | <b>Primer</b>          | <b>Sequence</b>                | <b>Source</b>           |
|-------------|------------------------|--------------------------------|-------------------------|
| 16S         | 16L19<br>(forward)     | AATACCTAACGAACTTAGCGATAGCTGGTT | Henicke et.<br>al. 2007 |
|             | 16H36E<br>(reverse)    | AAGCTCCAWAGGGTCTTCTCGTC        | Henicke et.<br>al. 2007 |
| ND1         | 16s-frog<br>(forward)  | TTACCCTRGGGATAACAGCGCAA        | Wiens et.<br>al. 2005   |
|             | tMet-frog<br>(reverse) | TTGGGGTATGGGCCCAAAGCT          | Wiens et.<br>al. 2005   |
| RAG1        | R182<br>(forward)      | GCCATAACTGCTGGAGCATYAT         | Henicke et.<br>al. 2007 |
|             | R270<br>(reverse)      | AGYAGATGTTGCCTGGGTCTTC         | Henicke et.<br>al. 2007 |
