# Supplementary material for: Systematics of Huicundomantis, a new subgenus of Pristimantis (Anura, Strabomantidae) with extraordinary cryptic diversity and eleven new species
Source: PubMed Central journal article supplement (PMC6687670; doi:10.3897/zookeys.868.26766), 2019-08-01
Supplement: zookeys-868-001-s004.pdf [file zookeys-868-001-s004.pdf]

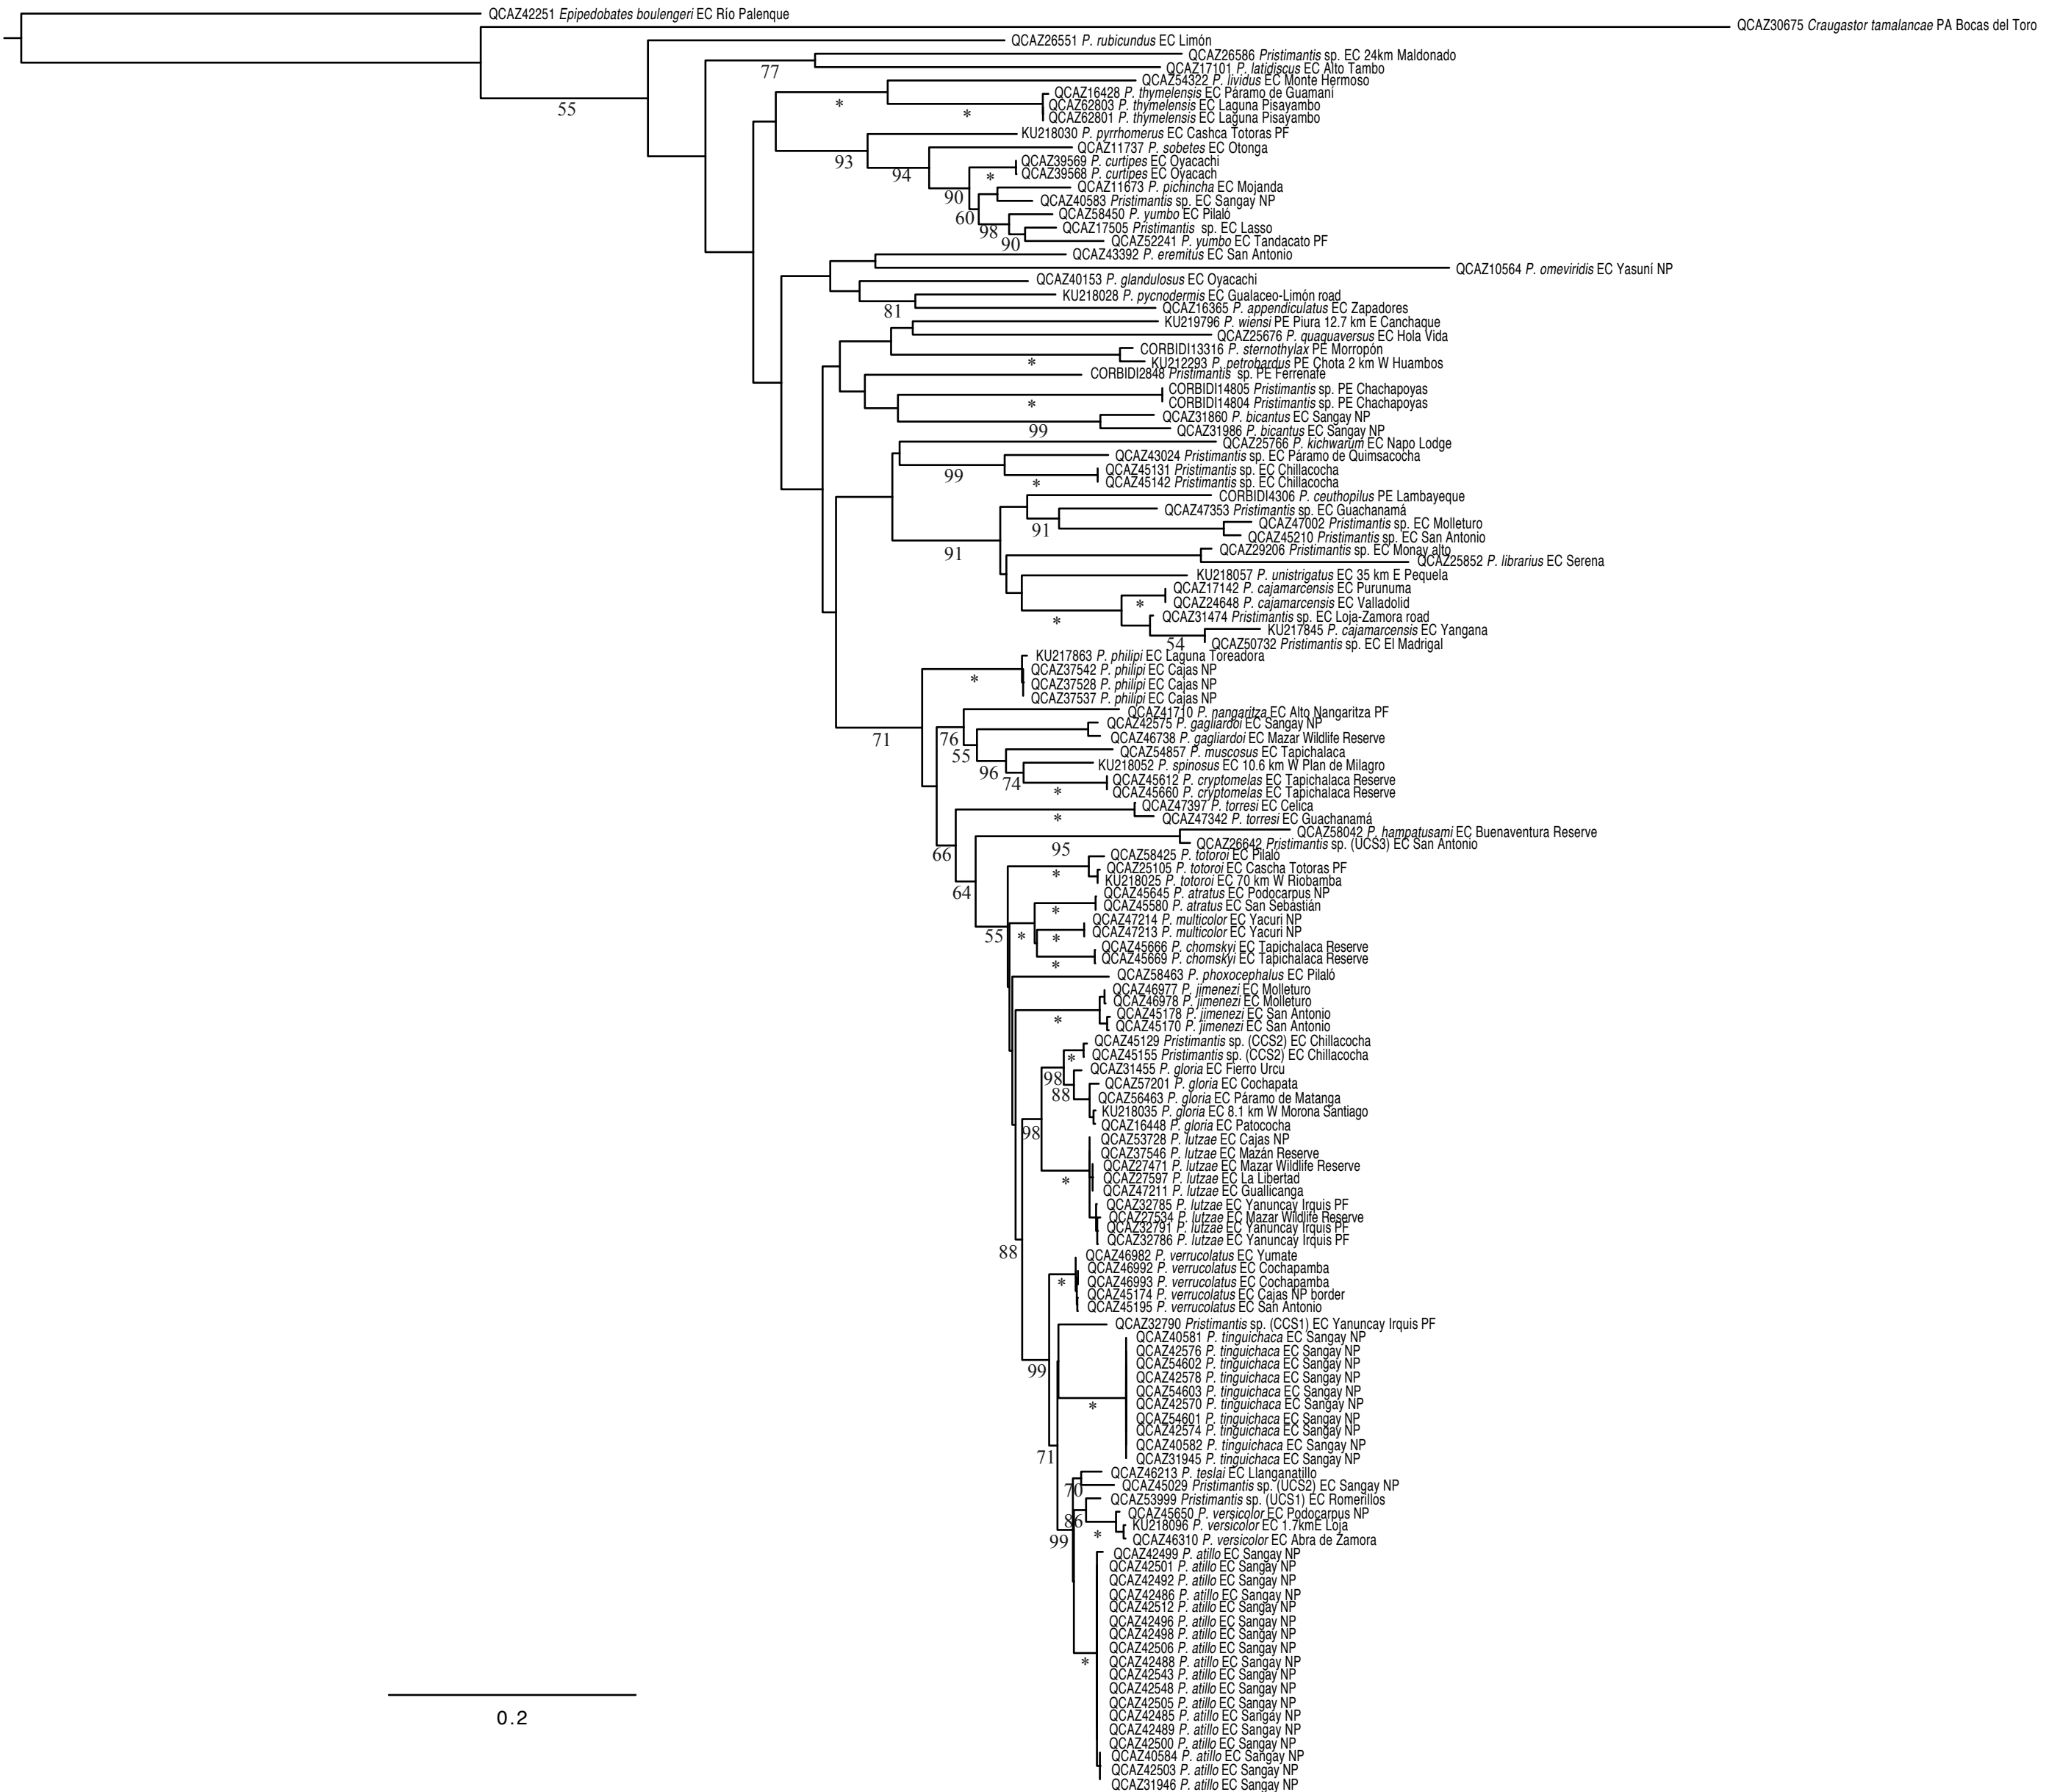

0.2

**Appendix D.** Mitochondrial phylogram depicting relationships within *Huicundomantis*. ML tree for genes 16S and ND1. Bootstrap values (%) are shown under the corresponding branches; missing values indicate values below 50 %; asterisks indicate support values of 100%. The number of collection, identification, country and locality of the samples are shown next to each terminal. EC is for Ecuador, PE for Peru, PA is for Panama, NP is for National Park, PF is for Protected Forest. Outgroup is shown.
